# Supplementary material for: Receptor residence time trumps drug-likeness and oral bioavailability in determining efficacy of complement C5a antagonists
Source: PubMed Central journal article supplement (PMC4837355; doi:10.1038/srep24575), 2016-04-20
Supplement: srep24575-s1.pdf [file srep24575-s1.pdf]

## Supplementary Information

### Receptor residence time trumps drug-likeness and oral bioavailability in determining efficacy of complement C5a antagonists

Vernon Seow<sup>1a†</sup>, Junxian Lim<sup>1a,2,3†</sup>, Adam J. Cotterell<sup>1a</sup>, Mei-Kwan Yau<sup>1a,2,3</sup>, Weijun Xu<sup>1a,2,3</sup>, Rink-Jan Lohman<sup>1a,2,3</sup>, W. Mei Kok<sup>1a,2,3</sup>, Martin J. Stoermer<sup>1a</sup>, Matthew J. Sweet<sup>1b,2,3</sup>, Robert C. Reid<sup>1a,2,3</sup>, Jacky Y. Suen<sup>1a,2,3</sup>, David P. Fairlie<sup>1a,2,3\*</sup>

<sup>1a</sup>Division of Chemistry and Structural Biology or <sup>1b</sup>Division of Cell Biology and Molecular Medicine, Institute for Molecular Bioscience, The University of Queensland, Brisbane, QLD 4072, Australia.

<sup>2</sup>Centre for Inflammation and Disease Research, Institute for Molecular Bioscience, The University of Queensland, Brisbane, QLD 4072, Australia.

<sup>3</sup>ARC Centre of Excellence in Advanced Molecular Imaging, Institute for Molecular Bioscience, The University of Queensland, Brisbane, QLD 4072, Australia.

†These authors contributed equally.

**\*Correspondence to:** Professor David P. Fairlie (Tel: +61-7334 62989, Fax: +61-7334 62990, Email: [d.fairlie@imb.uq.edu.au](mailto:d.fairlie@imb.uq.edu.au))

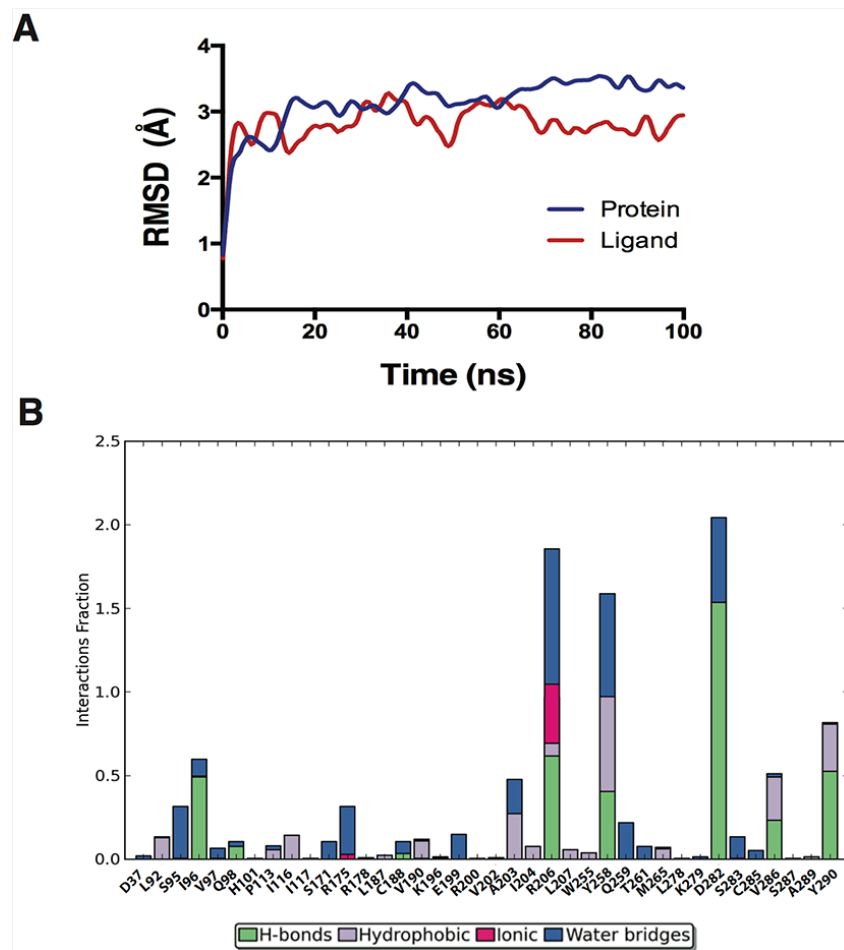

**Supplementary Figure 1. Statistics from MD simulations.** (A) C5aR-3D53 root mean square deviation (RMSD) over 100 ns MD simulations. (B) C5aR-3D53 interaction intensities plot.



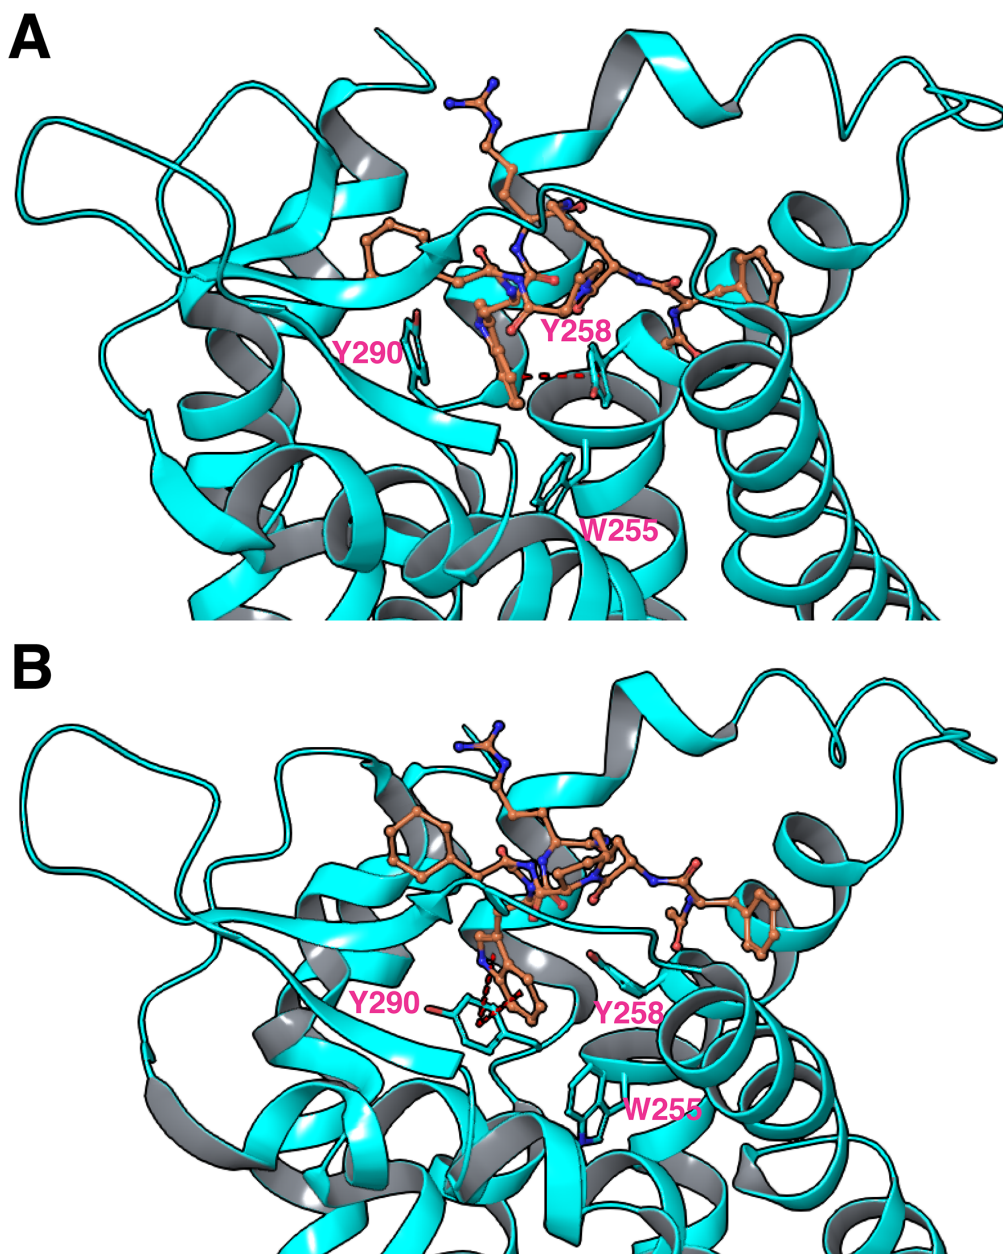

**Supplementary Figure 3. C5aR-3D53 interactions at 25 ns and 45 ns. (A)** 25 ns, Trp5 pi-stacked between TM6 (Tyr258) and TM7 (Tyr290). **(B)** 45 ns, Trp5 moved out to form H-bond with Y290, with an intermediate stage of forming a T-shaped edge-to-face pi-stacking interaction with Y290.

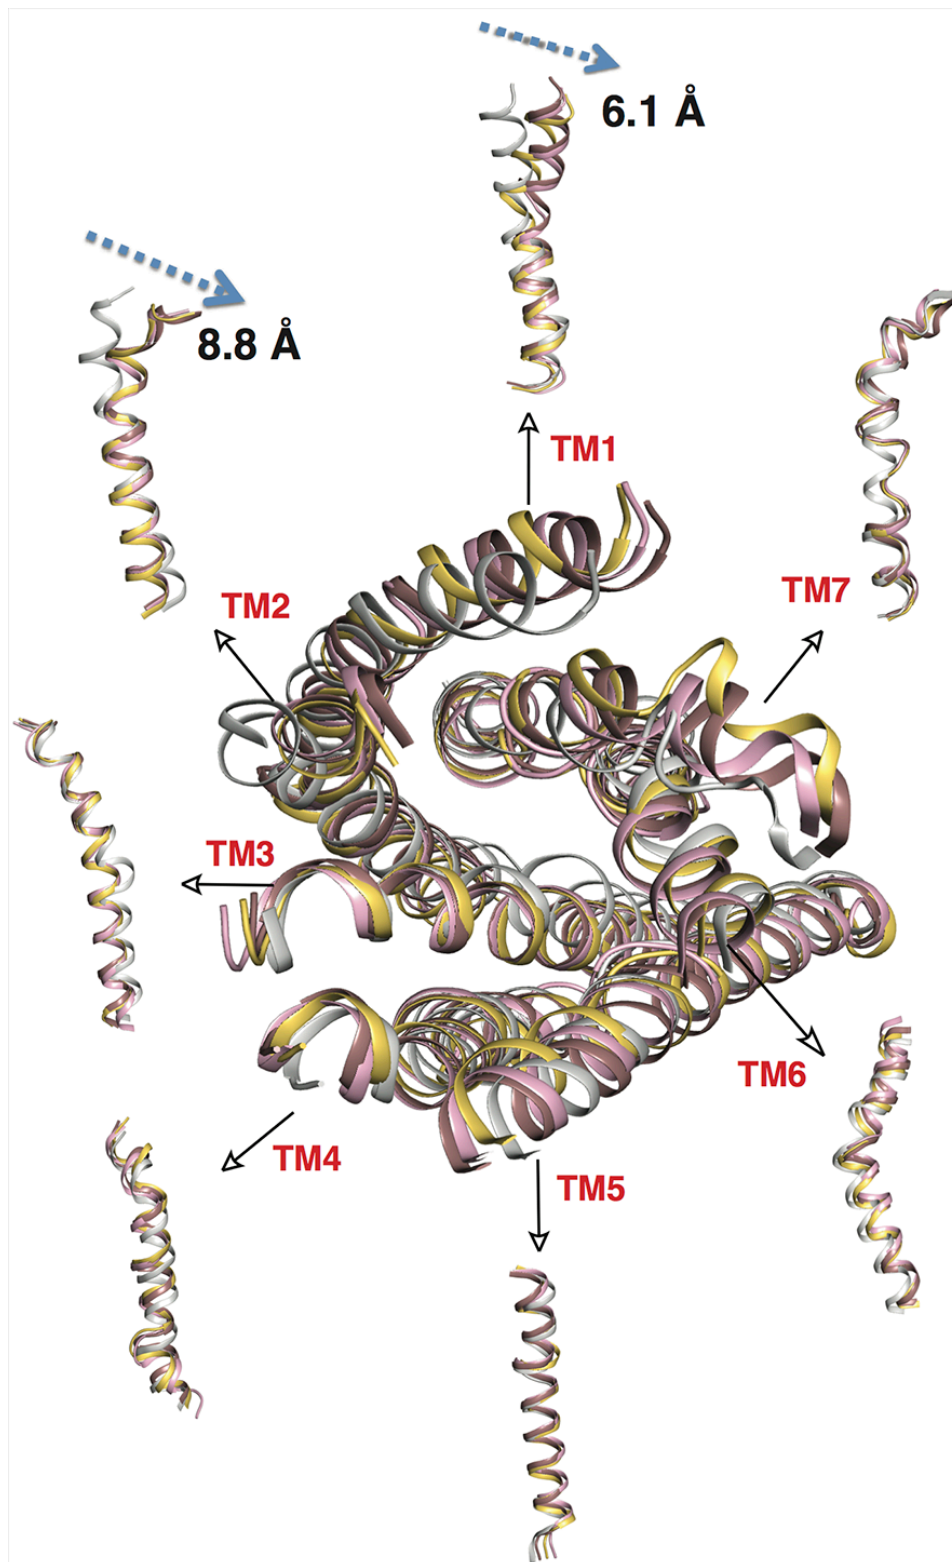

**Supplementary Figure 4. Comparison of relative conformational change in C5aR transmembrane.** Four different time points were sampled during 3D53-C5aR MD simulations (3D53 ligand was removed for clarity), white: 10 ns; pink: 50 ns; gold: 80 ns and brown: 100 ns. Transmembrane (TM) 1 and 2 helices were observed to undergo significant conformational changes in the MD simulations of the 3D53-C5aR complex, moving 8.8 Å and 6.1 Å respectively.

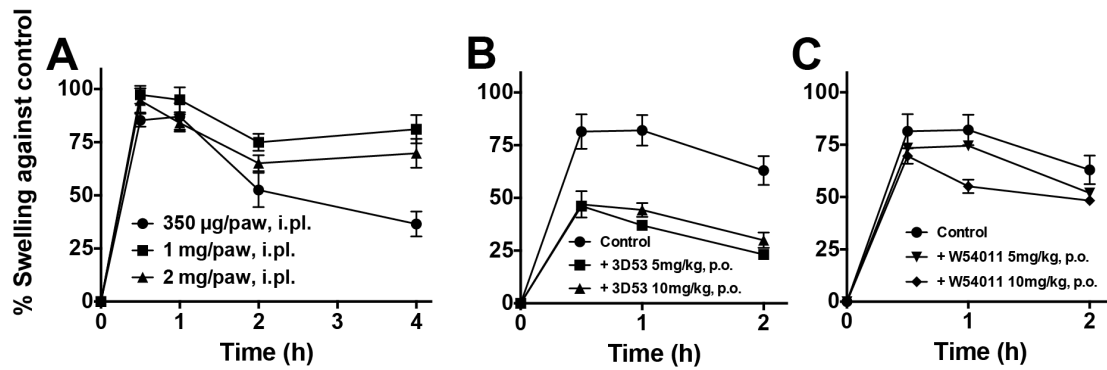

**Supplementary Figure 5. Optimization for C5aR-PA-induced paw oedema in male Wistar rats.** (A) Intraplantar (i.pl.) administration of C5aR-PA (0.35-2 mg per paw in 100 µL of saline control). Paw swelling was recorded over 4 h duration and expressed as percentage area change from baseline. The maximal swelling induced by 350 µg C5aR-PA maximized after 1 h before subsiding after 4 h following injection. Higher doses of C5aR-PA (1 mg and 2 mg) did not further increase the magnitude of paw swelling, so 350 µg was considered an optimal dose of C5aR-PA for injection per paw. (B) 3D53 and (C) W54011 (5 and 10 mg/kg, p.o. in 500 µL olive oil per rat) given orally 1 h prior 350 µg C5aR-PA injection. Error bars are means ± SEM (n=2 per group).

CLUSTAL W (1.83) multiple sequence alignment

```

sp|P61073|CXCR4_HUMAN  MEGISITYSDNYTEEMGSGDYDSMKPECFREENANFNKIFLPTIYSIIFLTGIVGNGLVILVMGYQKLRSMTDKYRLHL  80
sp|P21730|C5AR1_HUMAN  MDSFNYYTTP-DYGHYDDKDTLDLNTFPVDKTSNTLRVPDILALVIFAVVFLVGLGNALVWVTAFAEK-RTINAIWFLNL  78
      *:::  * ::* . . . . * . . . . . :. . . . * : . : : : : * : : : : * : : : : * : : : : * : :

sp|P61073|CXCR4_HUMAN  SVADLLFVITLPFWAVD--AVANWYFGNFLCKAVHIYTVNLYSSVLILAFISLDRYLAIIVHATNSQRPRKLLAEKVYVY  158
sp|P21730|C5AR1_HUMAN  AVADFLSCLALPILFTSIVQHHHPFGGAACCSILPSLILLNMYASILLLATISADRFLLVFKPIWCNFRGAGLAWIACA  158
      :***: * : : : . . . . . : * ** . * : : : : * : : : : * : : : : * : : : : * : : . . . .

sp|P61073|CXCR4_HUMAN  GWIIPALLLTIPDFIFANVSE--ADDRYICDRFYPNDLWV-VVFQFHIMVGLILPGIVILSCYCIISKLSHSGKHQKR  235
sp|P21730|C5AR1_HUMAN  VAWGLALLLTIPSFLYRVVREYFPPKVLGVDYSHDKRRERAVAIVRLVLFGLWPLLTITICYTFILLRTVSRRASTRST  238
      . * ***** : * : * * : : * . * : * . . . . : : : : : : * : : * : : : : . . .

sp|P61073|CXCR4_HUMAN  KALKTTVILILAFFACWLPYYIGISIDSIFLLEIKQGCDEFENTVHKWISITEALAFFHCCLNPILYAFLGAKFKTSAQH  315
sp|P21730|C5AR1_HUMAN  KTLKVVAVVASFFIFWLPYQVT-----GIMMSFLEPSSPTFLLLKKLDSLCSFAYINCCINPIIYVAVAGQGFQGLR  313
      * : * . * : : * : * * : : * : : : : . . . . . : * : * : : * : : : : * : : : : * : :

sp|P61073|CXCR4_HUMAN  ALTSVSRGSS--LKILSKGRGGHSSVSTESSESSFHSS  352
sp|P21730|C5AR1_HUMAN  SLPSSLRNVLTEESVRESKSFTRSTVDTMAQ--KTQAV  350
      : * : * : * . . . . : : * : * : * : * : : : . . .

```

**Supplementary Figure 6. ClustalW sequence alignment of human CXCR4 and C5aR1.** CXCR4 was the top template with sequence identity of 32% and sequence similarity of 53% to C5aR. Uniprot ID codes are provided.

# Ramachandran Plot

input\_atom\_only

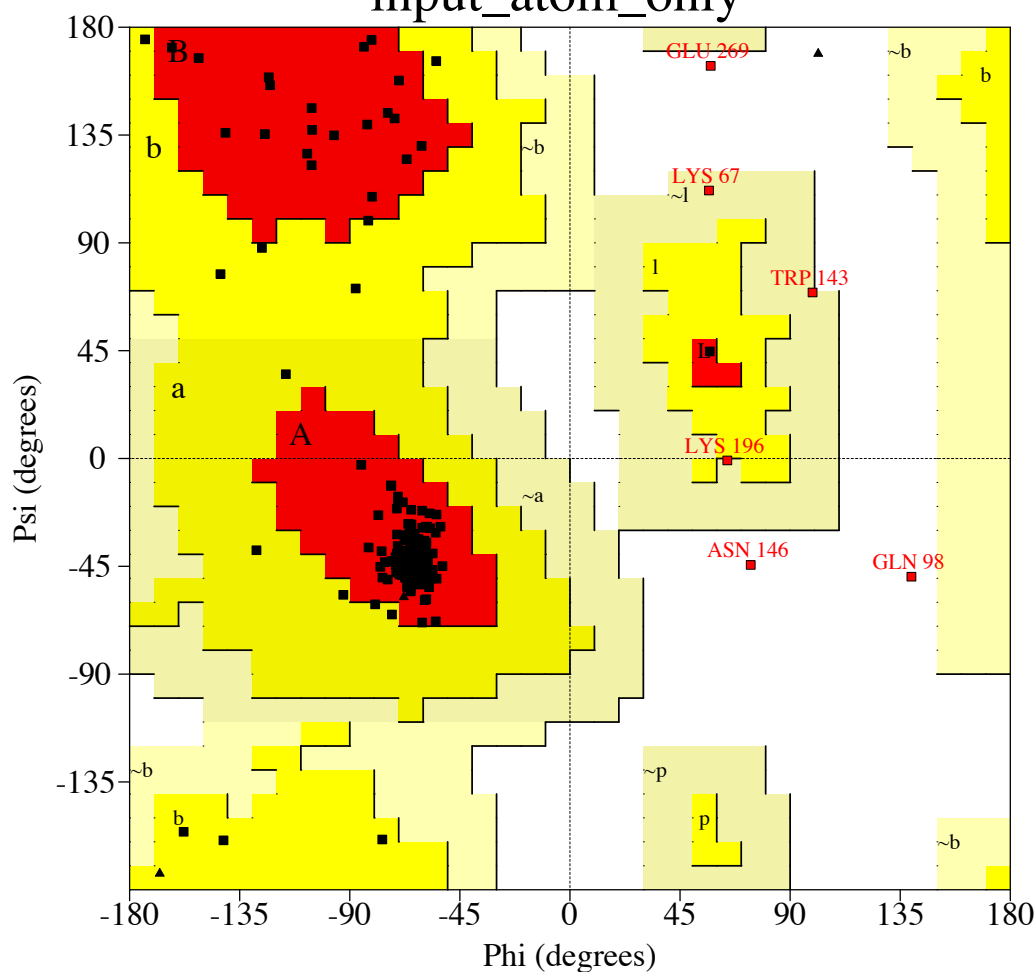

## Plot statistics

|                                                      |     |        |
|------------------------------------------------------|-----|--------|
| Residues in most favoured regions [A,B,L]            | 222 | 91.7%  |
| Residues in additional allowed regions [a,b,l,p]     | 14  | 5.8%   |
| Residues in generously allowed regions [~a,~b,~l,~p] | 3   | 1.2%   |
| Residues in disallowed regions                       | 3   | 1.2%   |
| -----                                                |     |        |
| Number of non-glycine and non-proline residues       | 242 | 100.0% |
| Number of end-residues (excl. Gly and Pro)           | 2   |        |
| Number of glycine residues (shown as triangles)      | 10  |        |
| Number of proline residues                           | 13  |        |
| -----                                                |     |        |
| Total number of residues                             | 267 |        |

**Supplementary Figure 7. Ramachandran Plot of stereochemical property of residues and quality assessment of the homology model of C5aR TM region.** 98.7% of the residues were located in the favored and allowed  $\phi$ - $\psi$  regions, whereas only 3 residues were in disallowed region. The model of C5aR TM regions forms intact canonical seven-helical bundles. The TM backbone rmsd between the model and the template CXCR4 is 0.18 Å. The Qmean<sup>1</sup> score is 0.45 and DFire<sup>2</sup> energy is -407.7. The results were comparable to original template with a Qmean6 score of 0.48 and DFire energy of -470.



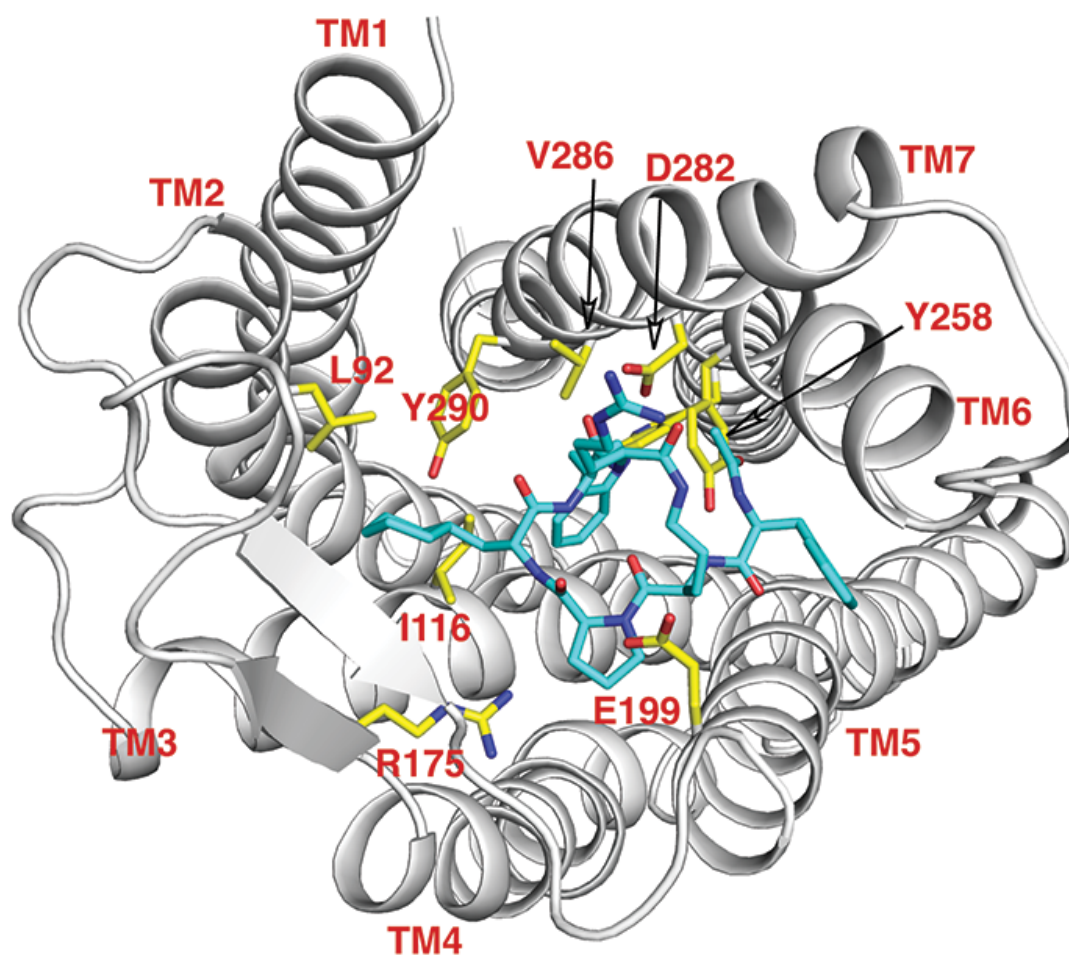

**Supplementary Figure 8. Top docked pose of 3D53 in C5aR homology model.** Docked pose of 3D53 in C5aR homology model showed similar pose to previous studies<sup>13</sup>. Trp5 of 3D53 is known to dictate function, switching to agonist activity if Trp was changed to a hydrophobic non-aromatic group but maintaining antagonist activity if changed to an aromatic group (Phe, Naphthalanine)<sup>13</sup>. Ile116 is known to be important for this activation switch blocked by Trp5<sup>25</sup>. On the opposite side, Val286 was also shown to contribute to the mechanism. Thus Trp5 is in the vicinity of Ile116 and Val286. Ac-Phe was predicted to locate between TM5 and TM6, there was no dominant interaction with this residue, consistent with our previous modelling studies<sup>25</sup>. Arg6 was not observed to form any salt-bridge to protein residues but was exposed to solvent.



**Supplementary Table 1. Pharmacokinetics parameters of C5aR antagonists in rats.**

|                                 | 3D53 <sup>a</sup> |      | W54011 <sup>a</sup> |       | JJ47 <sup>a</sup> |      |
|---------------------------------|-------------------|------|---------------------|-------|-------------------|------|
|                                 | Average           | SEM  | Average             | SEM   | Average           | SEM  |
| Rat weight (g)                  | 221.6             | 9.3  | 254                 | 6.9   | 238.3             | 2.3  |
| V <sub>dss</sub> (L)            | 0.9               | 0.4  | 4.6                 | 0     | 0.8               | 0.1  |
|                                 | 4.1               | 1.9  | 18.3                | 3.1   | 3.5               | 0.5  |
| AUC i.v.<br>(0-8h)<br>(ng.h/ml) | 322.9             | 17.7 | 212.5               | 29.3  | 410.4             | 39.5 |
| AUC p.o.<br>(0-8h)<br>(ng.h/ml) | 76.6              | 31   | 1570.2              | 151.5 | 501.3             | 5.2  |
| CL<br>(ml/min/kg)               | 52.1              | 2.8  | 82.8                | 10.5  | 41                | 4    |
| t <sub>1/2</sub> (min)          | 21.6              | 4.4  | 124.4               | 31.3  | 43.2              | 4.8  |
| C <sub>max</sub> (ng/ml)        | 17.5              | 4.5  | 483.6               | 41.2  | 126.6             | 14.5 |
| T <sub>max</sub> (min)          | 50                | 20   | 180                 | 0     | 135               | 45   |
| F(%)                            | 2.4               | 1    | 74.3                | 7.9   | 12.2              | 0.1  |

<sup>a</sup>C5aR antagonist were administered 1 mg/kg i.v. and 10 mg/kg p.o.

V<sub>dss</sub>; volume of distribution steady

AUC; area under curve

CL; total clearance

t<sub>1/2</sub>; plasma half-life

C<sub>max</sub>; maximal plasma concentration reached

T<sub>max</sub>; time of maximal C<sub>max</sub>

F; Fraction of intact compound absorbed to plasma (oral availability)

**Supplementary Table 2. Primer sequences for target genes.**

| Gene         | 5'-3'                   | 3'-5'                     |
|--------------|-------------------------|---------------------------|
| <i>TNF</i>   | TCTGGCCCAGGCAGTCAGATC   | CACTGGAGCTGCCCTCAGC       |
| <i>IL1B</i>  | CCTCTTCGAGGCACAAGGCACAA | TGGCTGCTTCAGACACTTGAGCAAT |
| <i>CCL3</i>  | CCCACATTCCGTCACCTGCTCAG | AGCAGCAAGTGATGCAGAGAACTG  |
| <i>PTGS2</i> | TGGCAGGGTTGCTGGTGGTA    | TCTGCCTGCTCTGGTCAATGGA    |
| <i>I8S</i>   | ACCACGGGTGACGGGGAATC    | CCGGGTCGGGAGTGGGTAAT      |
